# Supplementary material for: Assessment of upper tropospheric and stratospheric water vapourand ozone in reanalyses as part of S-RIP
Source: Copernicus journal article supplement (doi:10.5194/acp-2017-377), 2017-05-23
Supplement: Supplementary file 1 [file acp-2017-377-supplement.pdf]

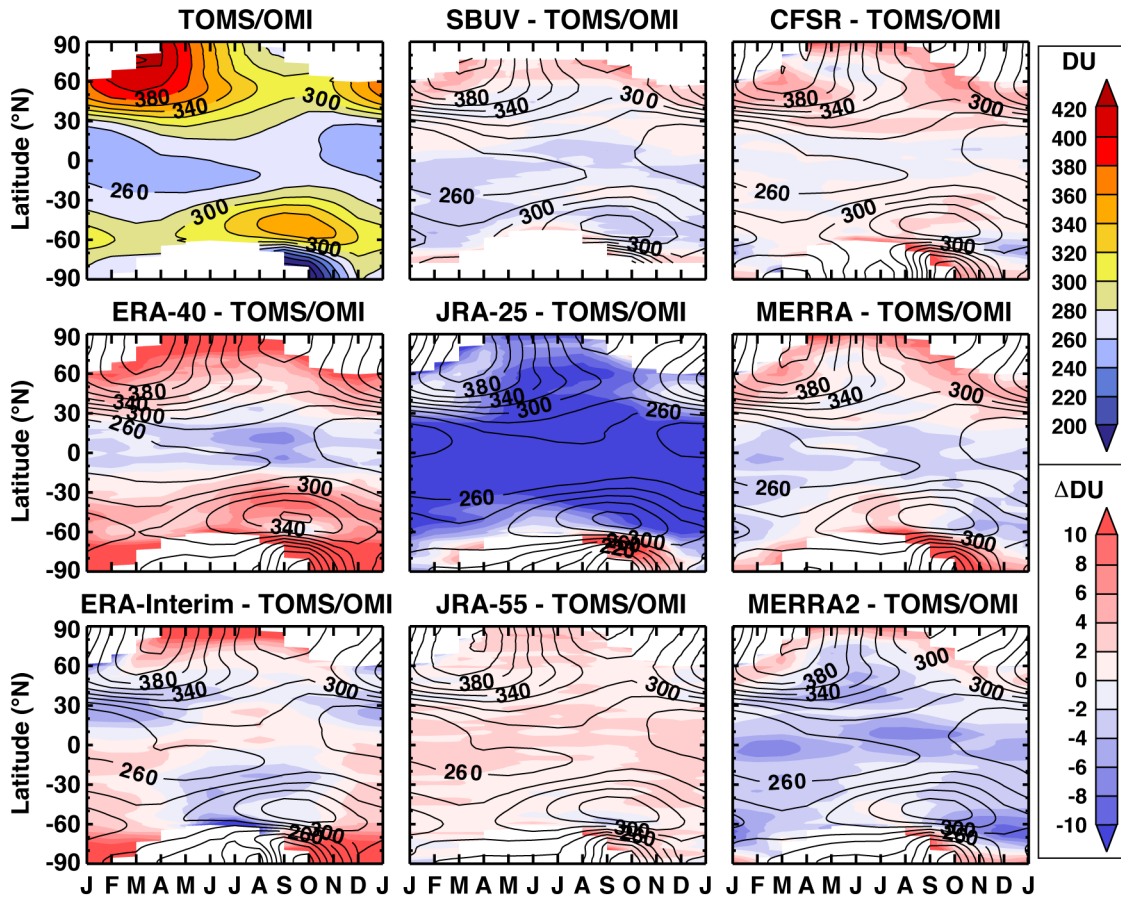

Figure S1: Same as Fig. 3, except using TOMS/OMI as the observational data set.

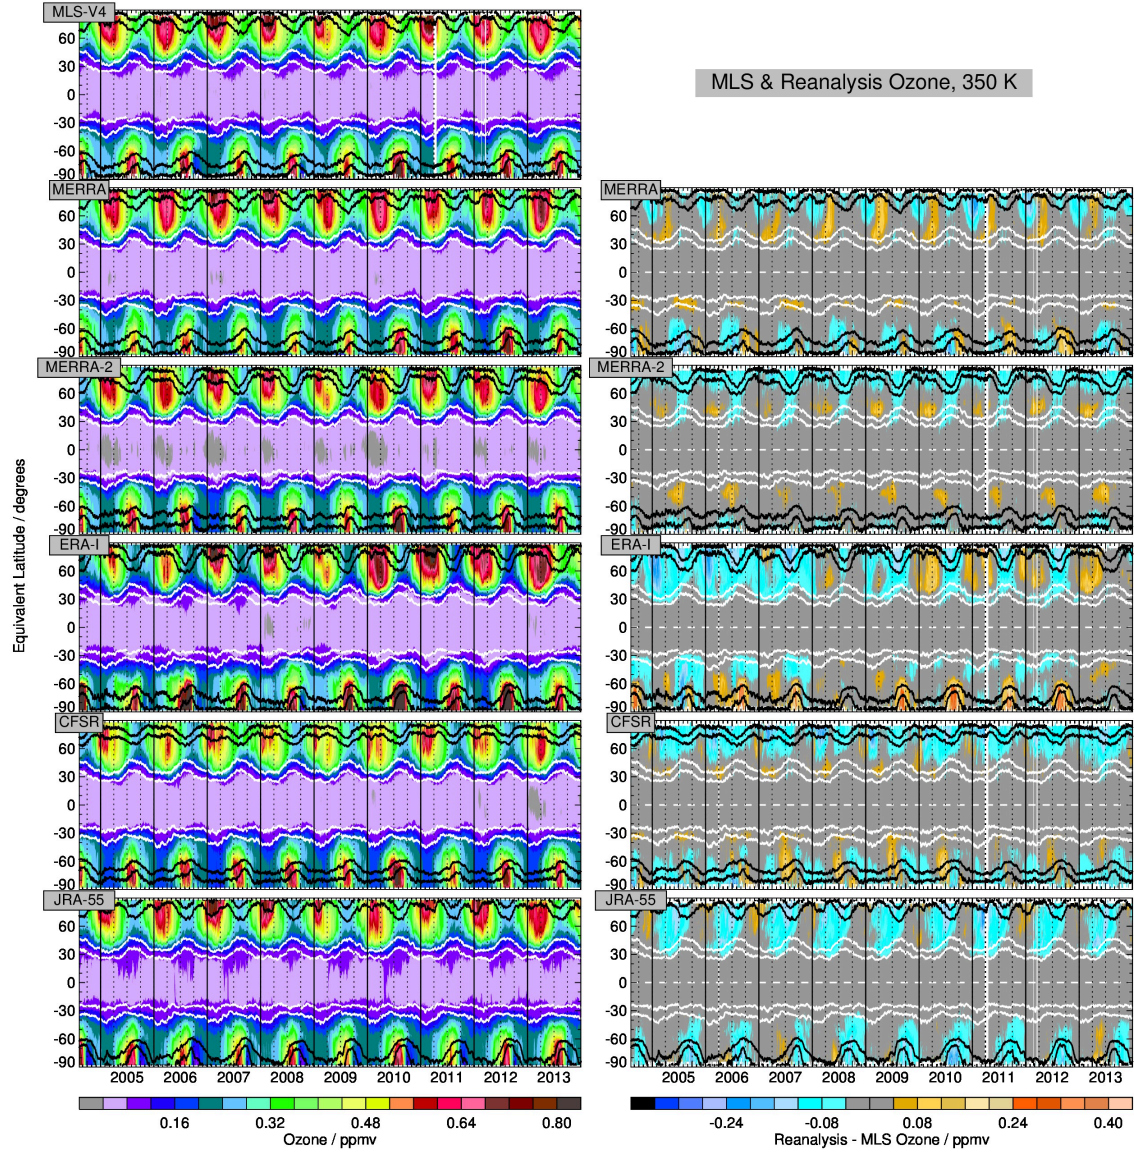

Figure S2: Same as Fig. 7, but at 350 K.

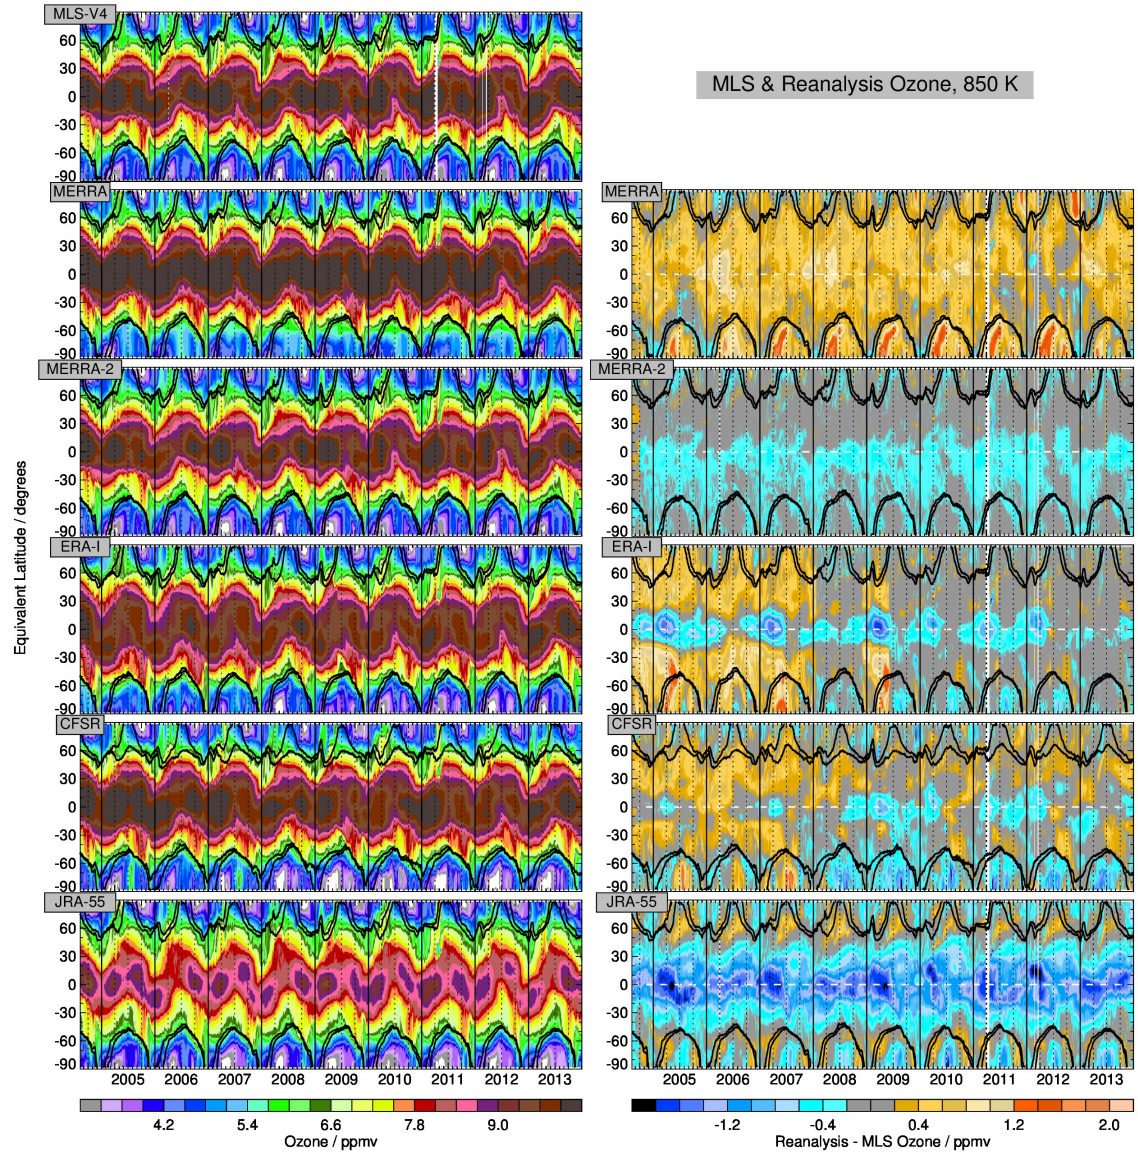

Figure S3: Same as Fig. 7, but at 850 K.

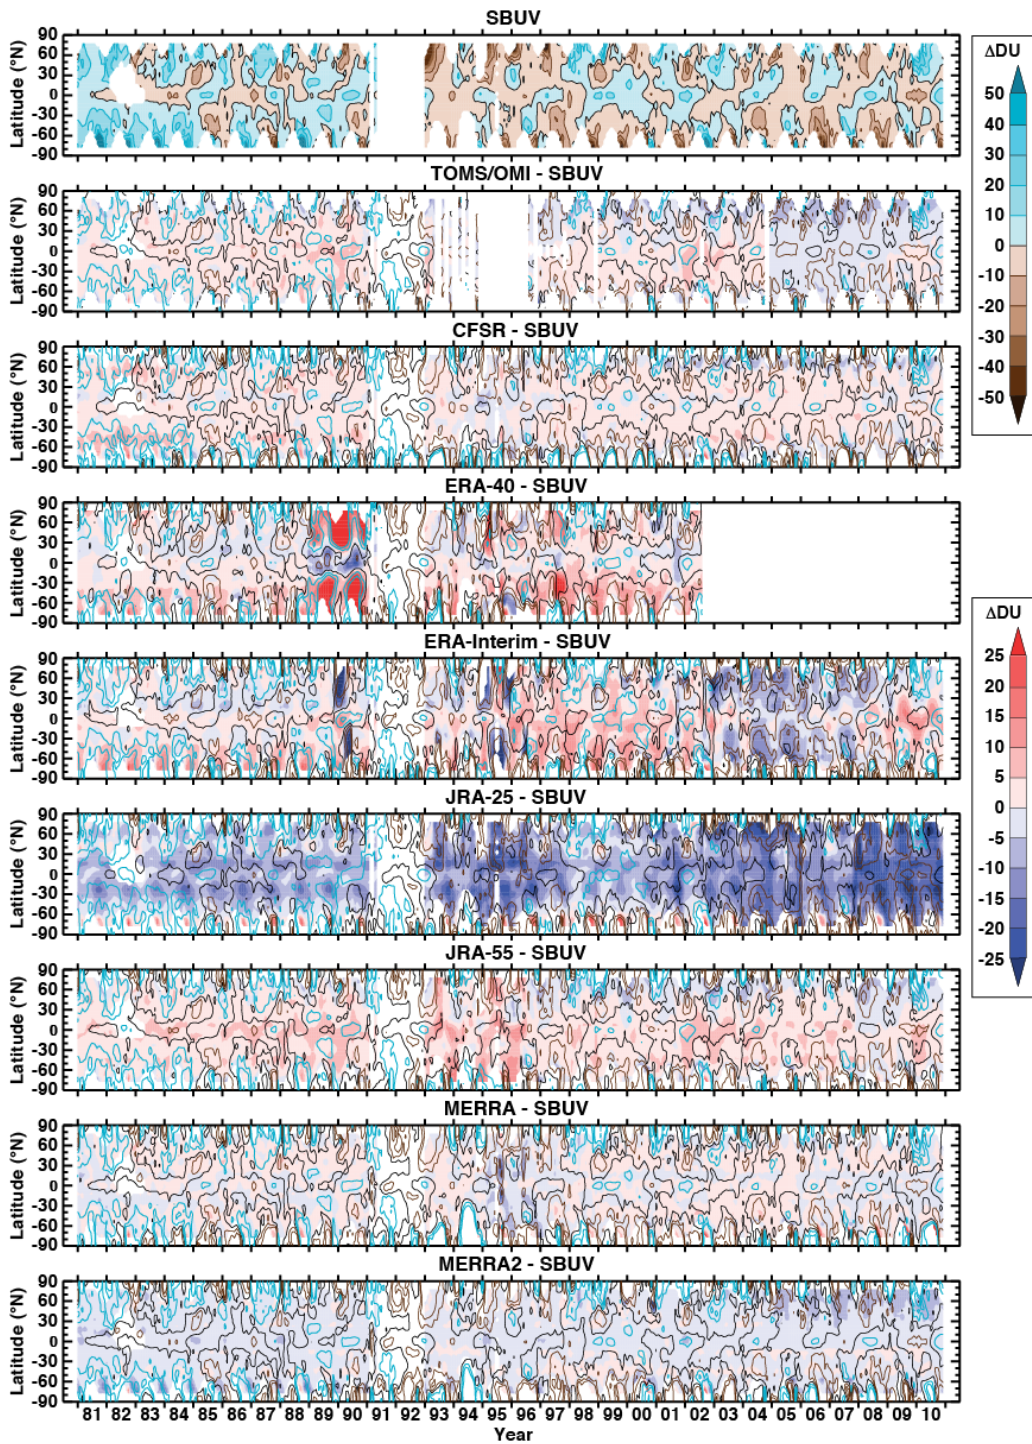

Figure S4: TOC latitude vs. time anomalies for SBUV (top row), differences between TOMS/OMI and SBUV (second from top), and differences between SBUV and the reanalyses (other rows).

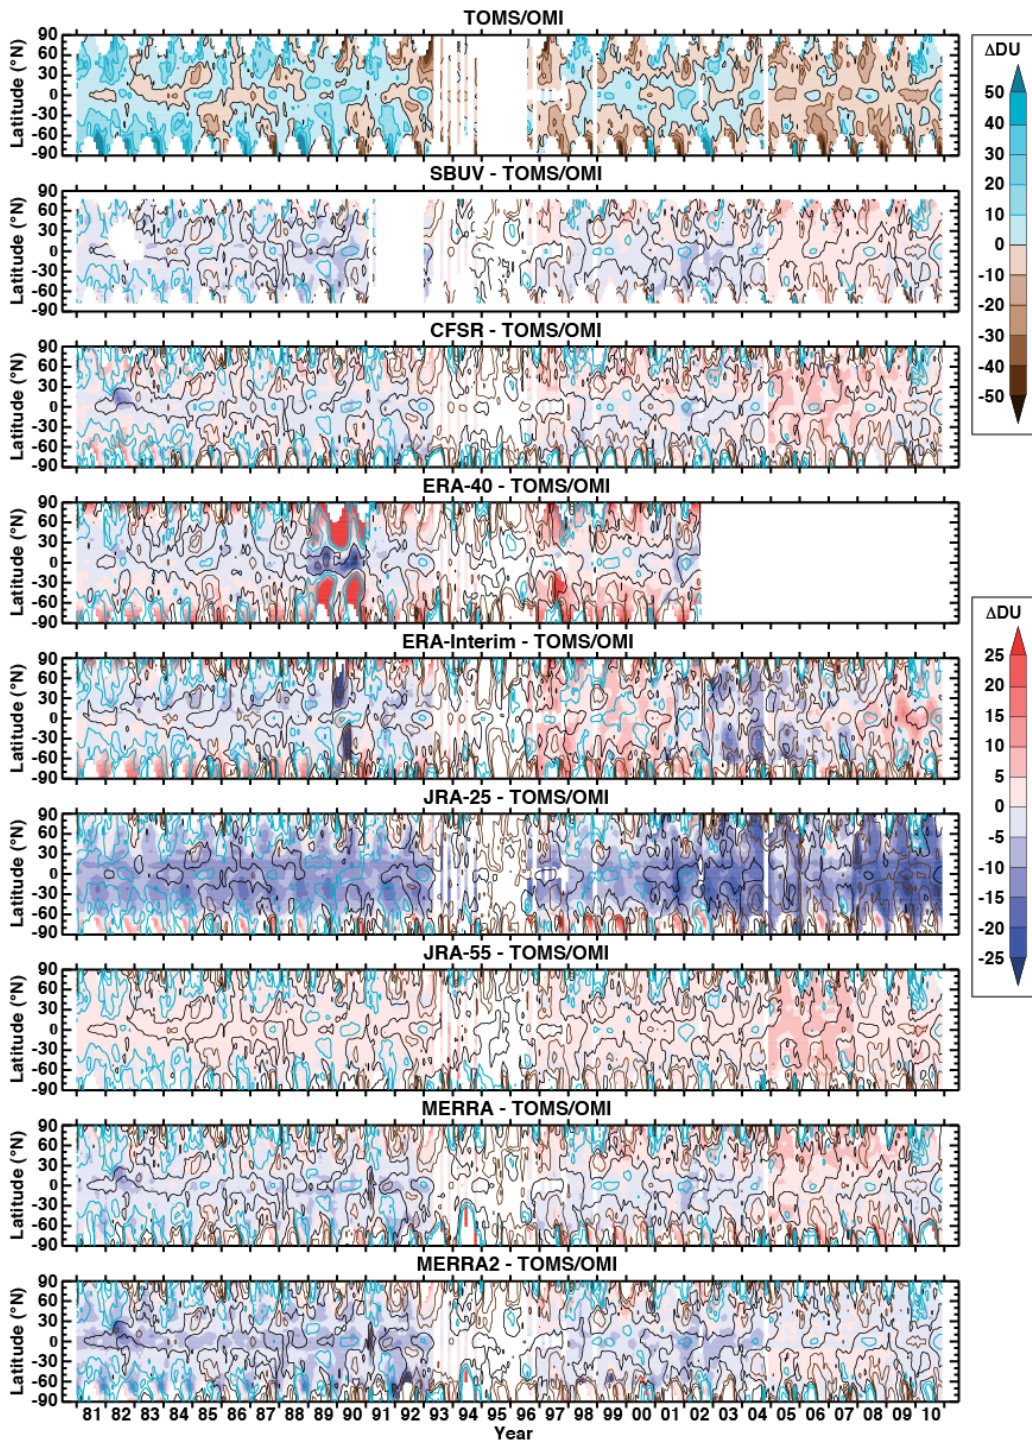

Figure S5: TO latitude vs. time anomalies for TOMS/OMI (top row), differences between SBUV and TOMS/OMI (second from top), and differences between TOMS/OMI and the reanalyses (other rows).
